# Supplementary material for: Deep ResU-Net Convolutional Neural Networks Segmentation for Smallholder Paddy Rice Mapping Using Sentinel 1 SAR and Sentinel 2 Optical Imagery
Source: MDPI journal article supplement (doi:10.3390/rs15061517), 2023-03-09
Supplement: s1 [file s1]

*Supplementary Materials for “Deep ResU-Net Convolutional Neural Networks Segmentation for Smallholder Paddy Rice Mapping using Sentinel SAR and optical imagery.”*

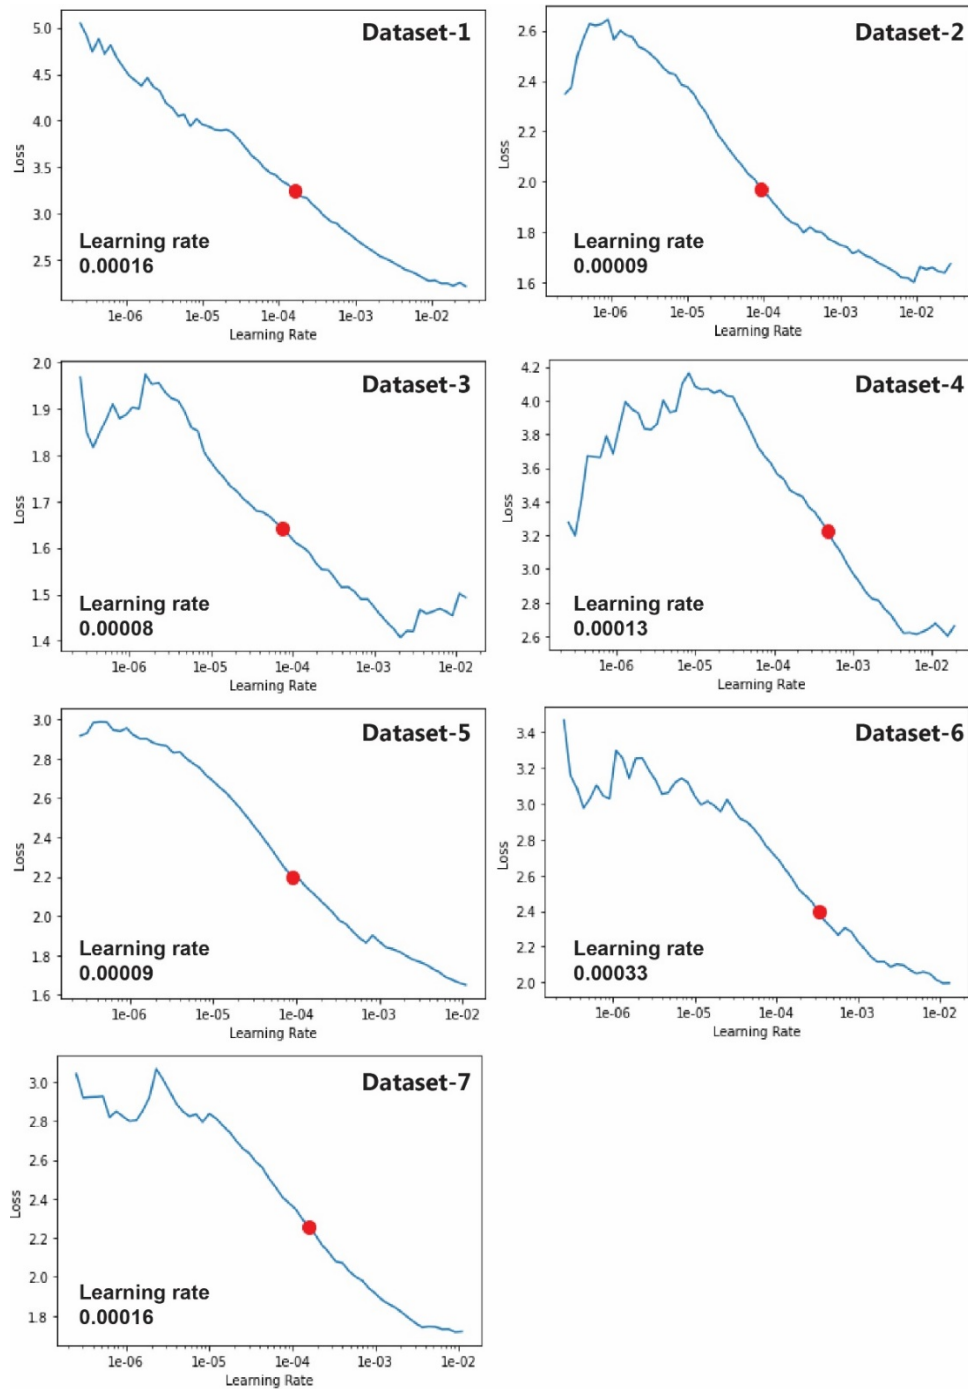

**Figure S1:** Learning rates chart of U-Net segmentation models evaluated in the study.

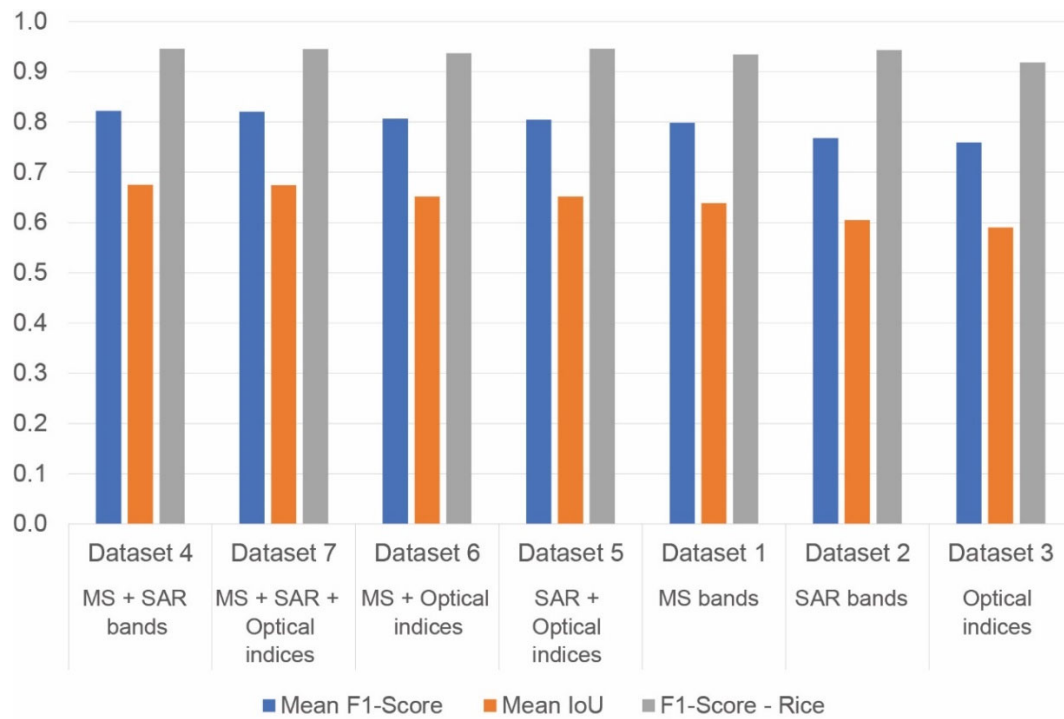

**Figure S2:** Accuracy assessment of U-Net prediction experiments performed in the study.

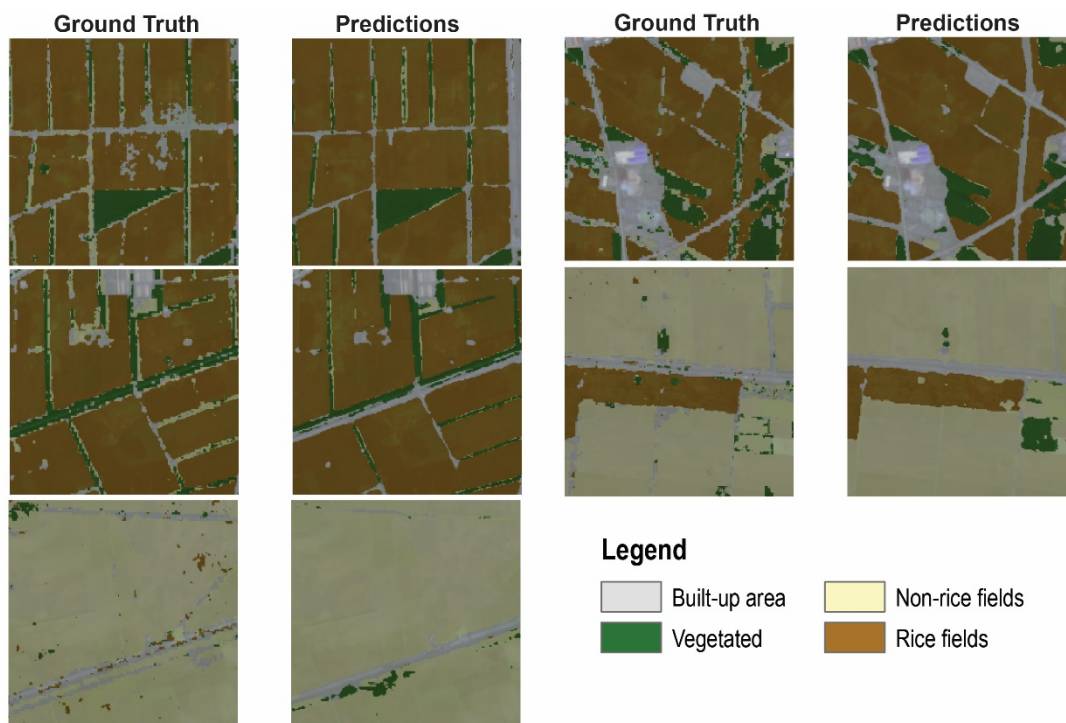

**Figure S3:** Preview of ground truth and prediction chips for one of the optimal datasets from the U-Net DL experiments (Dataset 4).

**Table S1:** Accuracy assessment results of U-Net predictions to establish the optimal image combination.

| <i>Dataset 1 - Multispectral bands</i>                   |               |           |                 |             | <i>Dataset 2 - SAR bands</i>                       |               |           |                 |             |
|----------------------------------------------------------|---------------|-----------|-----------------|-------------|----------------------------------------------------|---------------|-----------|-----------------|-------------|
| Metrics                                                  | Built-up area | Vegetated | Non-rice fields | Rice fields | Metrics                                            | Built-up area | Vegetated | Non-rice fields | Rice fields |
| <b>Precision</b>                                         | 0.77          | 0.71      | 0.88            | 0.91        | <b>Precision</b>                                   | 0.66          | 0.65      | 0.87            | 0.94        |
| <b>Recall</b>                                            | 0.67          | 0.62      | 0.89            | 0.96        | <b>Recall</b>                                      | 0.67          | 0.54      | 0.88            | 0.95        |
| <b>F1 Score</b>                                          | 0.72          | 0.66      | 0.88            | 0.93        | <b>F1 Score</b>                                    | 0.66          | 0.59      | 0.88            | 0.94        |
| <b>Mean IoU</b>                                          | 0.52          | 0.49      | 0.67            | 0.87        | <b>Mean IoU</b>                                    | 0.46          | 0.41      | 0.66            | 0.89        |
| <i>Dataset 3 - Optical indices</i>                       |               |           |                 |             | <i>Dataset 4 - Multispectral + SAR bands</i>       |               |           |                 |             |
| Metrics                                                  | Built-up area | Vegetated | Non-rice fields | Rice fields | Metrics                                            | Built-up area | Vegetated | Non-rice fields | Rice fields |
| <b>Precision</b>                                         | 0.72          | 0.64      | 0.88            | 0.89        | <b>Precision</b>                                   | 0.75          | 0.73      | 0.90            | 0.93        |
| <b>Recall</b>                                            | 0.69          | 0.47      | 0.86            | 0.95        | <b>Recall</b>                                      | 0.72          | 0.70      | 0.89            | 0.96        |
| <b>F1 Score</b>                                          | 0.70          | 0.54      | 0.87            | 0.92        | <b>F1 Score</b>                                    | 0.73          | 0.71      | 0.89            | 0.95        |
| <b>Mean IoU</b>                                          | 0.50          | 0.37      | 0.64            | 0.85        | <b>Mean IoU</b>                                    | 0.54          | 0.56      | 0.70            | 0.89        |
| <i>Dataset 5 - SAR + Optical indices</i>                 |               |           |                 |             | <i>Dataset 6 - Multispectral + Optical indices</i> |               |           |                 |             |
| Metrics                                                  | Built-up area | Vegetated | Non-rice fields | Rice fields | Metrics                                            | Built-up area | Vegetated | Non-rice fields | Rice fields |
| <b>Precision</b>                                         | 0.74          | 0.68      | 0.88            | 0.94        | <b>Precision</b>                                   | 0.74          | 0.70      | 0.90            | 0.92        |
| <b>Recall</b>                                            | 0.71          | 0.65      | 0.89            | 0.95        | <b>Recall</b>                                      | 0.71          | 0.65      | 0.88            | 0.95        |
| <b>F1 Score</b>                                          | 0.72          | 0.66      | 0.88            | 0.95        | <b>F1 Score</b>                                    | 0.72          | 0.67      | 0.89            | 0.94        |
| <b>Mean IoU</b>                                          | 0.53          | 0.49      | 0.69            | 0.89        | <b>Mean IoU</b>                                    | 0.53          | 0.51      | 0.69            | 0.88        |
| <i>Dataset 7 - Multispectral + SAR + Optical indices</i> |               |           |                 |             |                                                    |               |           |                 |             |
| Metrics                                                  | Built-up area | Vegetated | Non-rice fields | Rice fields |                                                    |               |           |                 |             |
| <b>Precision</b>                                         | 0.75          | 0.72      | 0.90            | 0.94        |                                                    |               |           |                 |             |
| <b>Recall</b>                                            | 0.72          | 0.70      | 0.89            | 0.96        |                                                    |               |           |                 |             |
| <b>F1 Score</b>                                          | 0.73          | 0.71      | 0.89            | 0.95        |                                                    |               |           |                 |             |
| <b>Mean IoU</b>                                          | 0.54          | 0.55      | 0.71            | 0.89        |                                                    |               |           |                 |             |

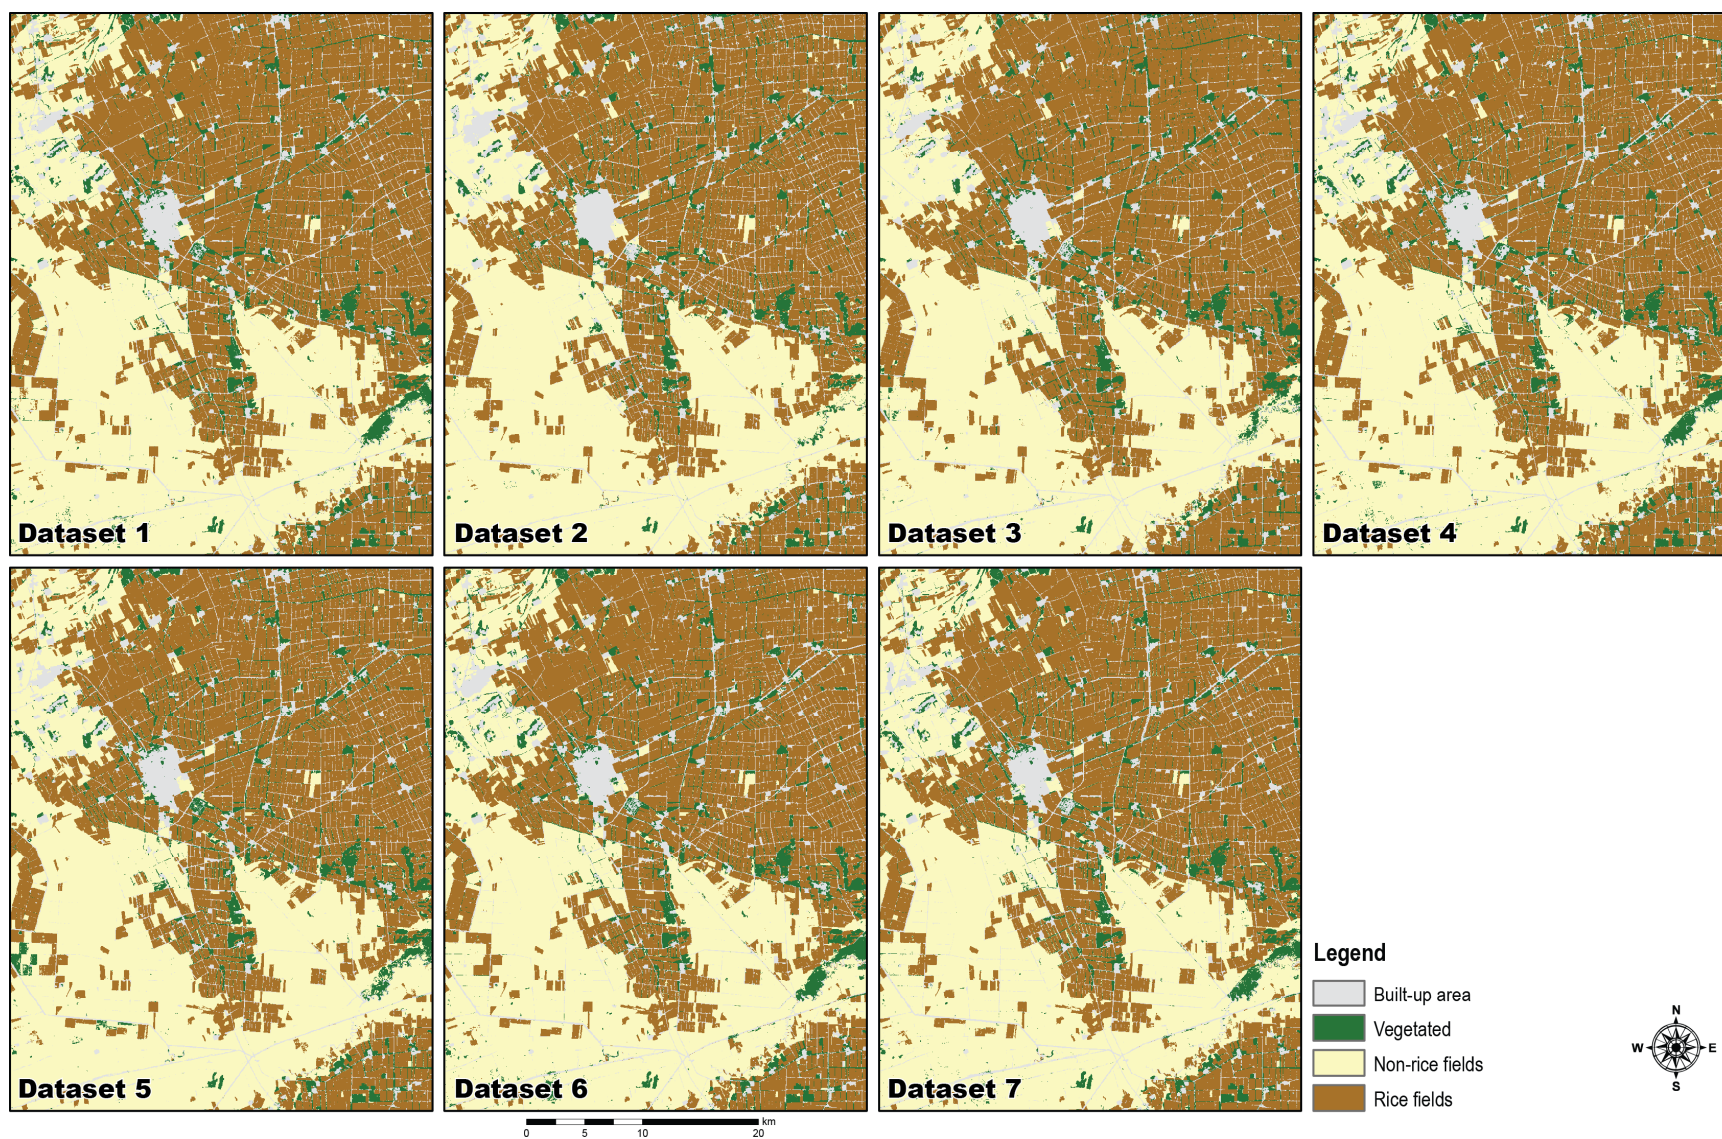

**Figure S4:** U-Net prediction of paddy rice fields generated using datasets evaluated in the study.



**Table S2:** Error matrix and classification accuracy results of the Random Forest classification and optimal U-Net prediction.

**U-Net - Dataset 4 - Multispectral + SAR bands**

| <b>Class Name</b>          | <b>Other landuse</b> | <b>Rice fields</b> | <b>Total</b> | <b>Users' Accuracy</b> |
|----------------------------|----------------------|--------------------|--------------|------------------------|
| Other landuse              | 696                  | 9                  | <b>705</b>   | 0.99                   |
| Rice fields                | 54                   | 241                | <b>295</b>   | 0.82                   |
| <b>Total</b>               | <b>750</b>           | <b>250</b>         | <b>1000</b>  |                        |
| <b>Producers' Accuracy</b> | 0.93                 | 0.96               |              |                        |
| <b>F1-Score</b>            | 0.96                 | 0.88               |              |                        |
| <b>Overall Kappa</b>       | 0.84                 |                    |              |                        |
| <b>Overall Accuracy</b>    | 0.94                 |                    |              |                        |
| <b>Mean F1-Score</b>       | 0.92                 |                    |              |                        |

**RF (250) - Dataset 4 - Multispectral + SAR bands**

| <b>Class Name</b>          | <b>Other landuse</b> | <b>Rice fields</b> | <b>Total</b> | <b>Users' Accuracy</b> |
|----------------------------|----------------------|--------------------|--------------|------------------------|
| Other landuse              | 691                  | 29                 | <b>720</b>   | 0.96                   |
| Rice fields                | 59                   | 221                | <b>280</b>   | 0.79                   |
| <b>Total</b>               | <b>750</b>           | <b>250</b>         | <b>1000</b>  |                        |
| <b>Producers' Accuracy</b> | 0.92                 | 0.88               |              |                        |
| <b>F1-Score</b>            | 0.94                 | 0.83               |              |                        |
| <b>Overall Kappa</b>       | 0.77                 |                    |              |                        |
| <b>Overall Accuracy</b>    | 0.91                 |                    |              |                        |
| <b>Mean F1-Score</b>       | 0.89                 |                    |              |                        |

**RF (500) - Dataset 4 - Multispectral + SAR bands**

| <b>Class Name</b>          | <b>Other landuse</b> | <b>Rice fields</b> | <b>Total</b> | <b>Users' Accuracy</b> |
|----------------------------|----------------------|--------------------|--------------|------------------------|
| Other landuse              | 692                  | 29                 | <b>721</b>   | 0.96                   |
| Rice fields                | 58                   | 221                | <b>279</b>   | 0.79                   |
| <b>Total</b>               | <b>750</b>           | <b>250</b>         | <b>1000</b>  |                        |
| <b>Producers' Accuracy</b> | 0.92                 | 0.88               |              |                        |
| <b>F1-Score</b>            | 0.94                 | 0.84               |              |                        |
| <b>Overall Kappa</b>       | 0.78                 |                    |              |                        |
| <b>Overall Accuracy</b>    | 0.91                 |                    |              |                        |
| <b>Mean F1-Score</b>       | 0.89                 |                    |              |                        |

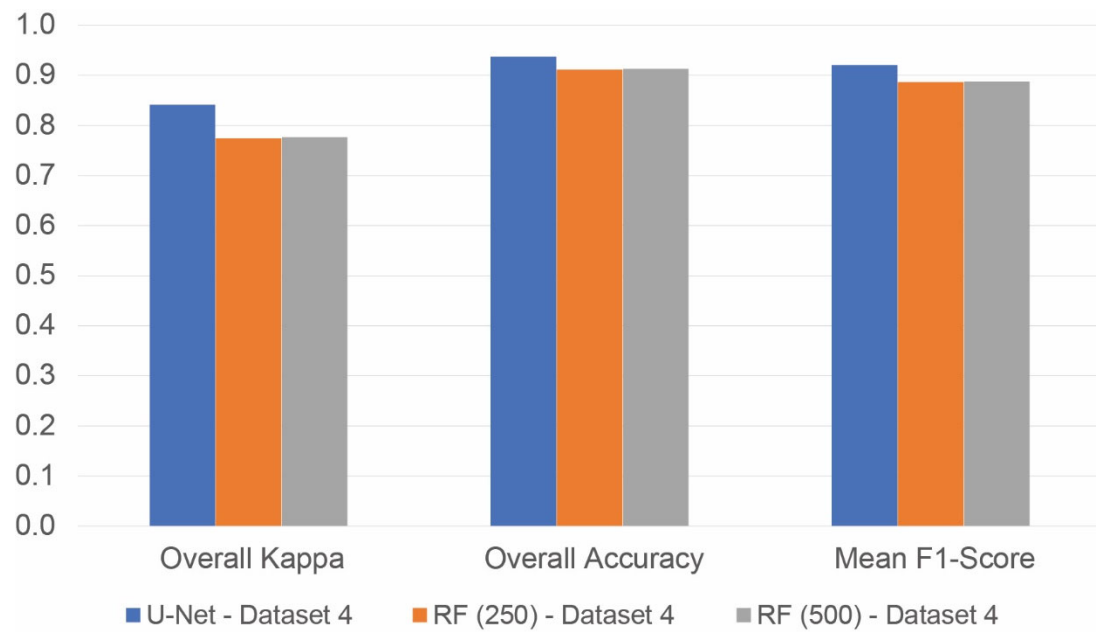

**Figure S5:** Accuracy assessment of U-Net prediction and Random Forest classification using optimal dataset.

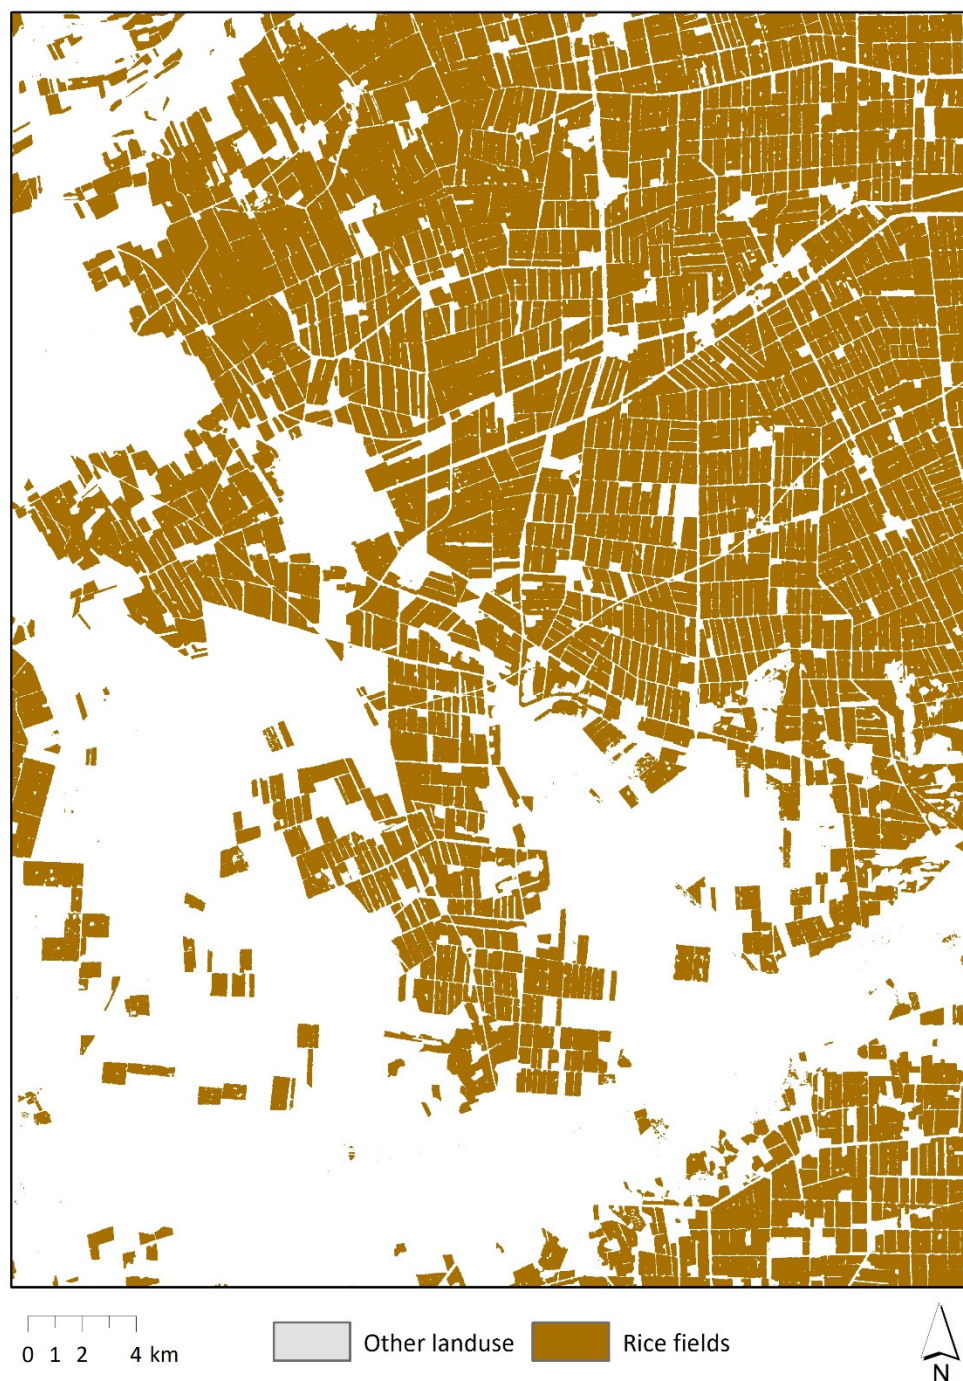

**Figure S6:** U-Net CNN segmentation paddy rice map produced from a combination of Sentinel 2 multispectral and Sentinel-1 dual polarization bands (Dataset 4).

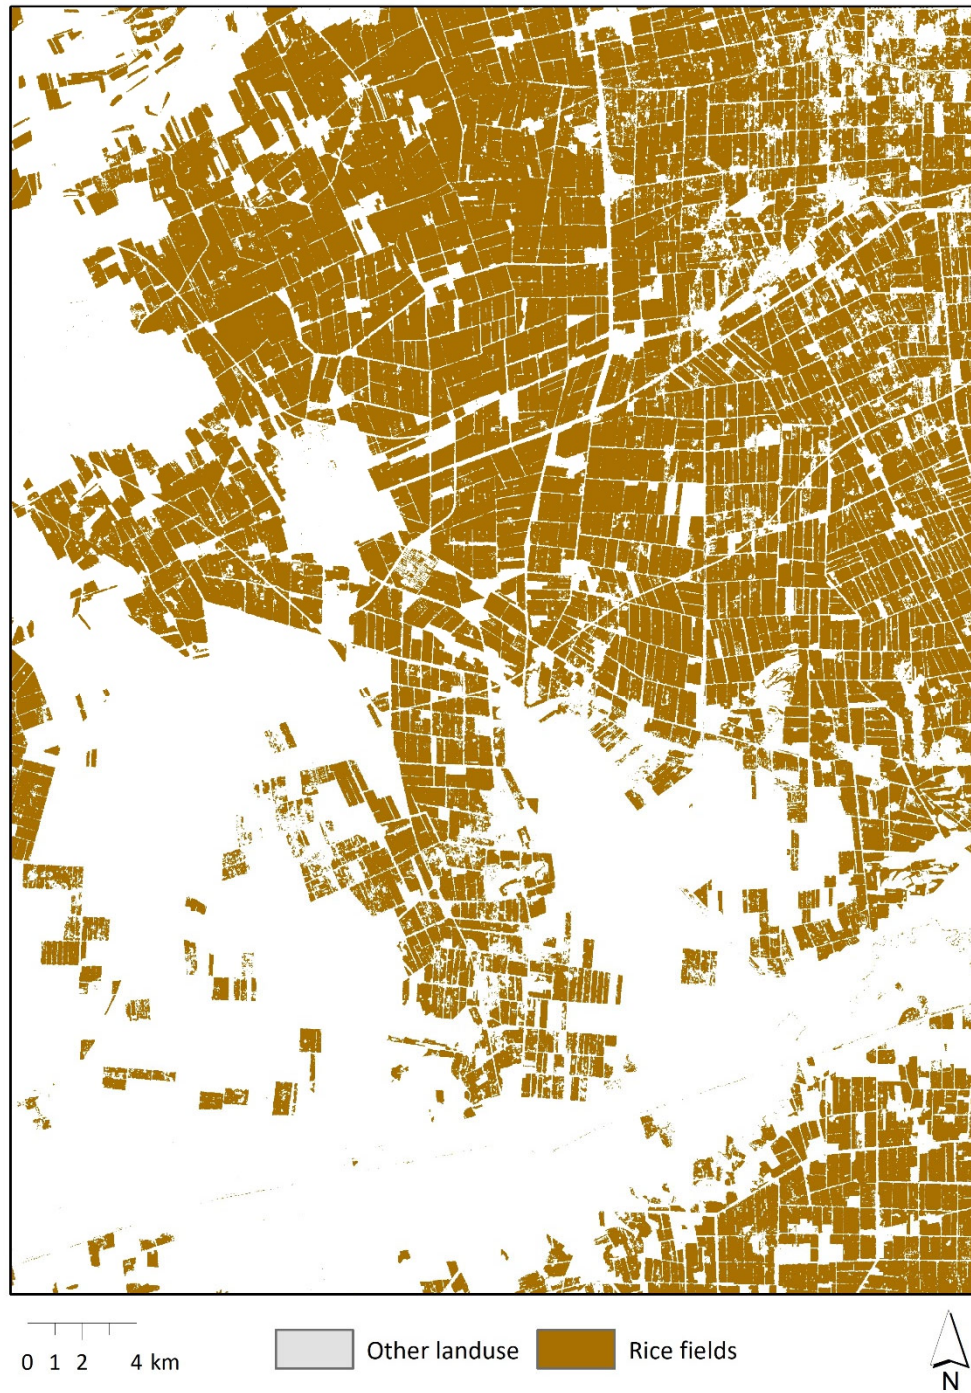

**Figure S7:** Random Forest (500 trees) paddy rice map produced from a combination of Sentinel 2 multispectral and Sentinel-1 dual polarization bands (Dataset 4).



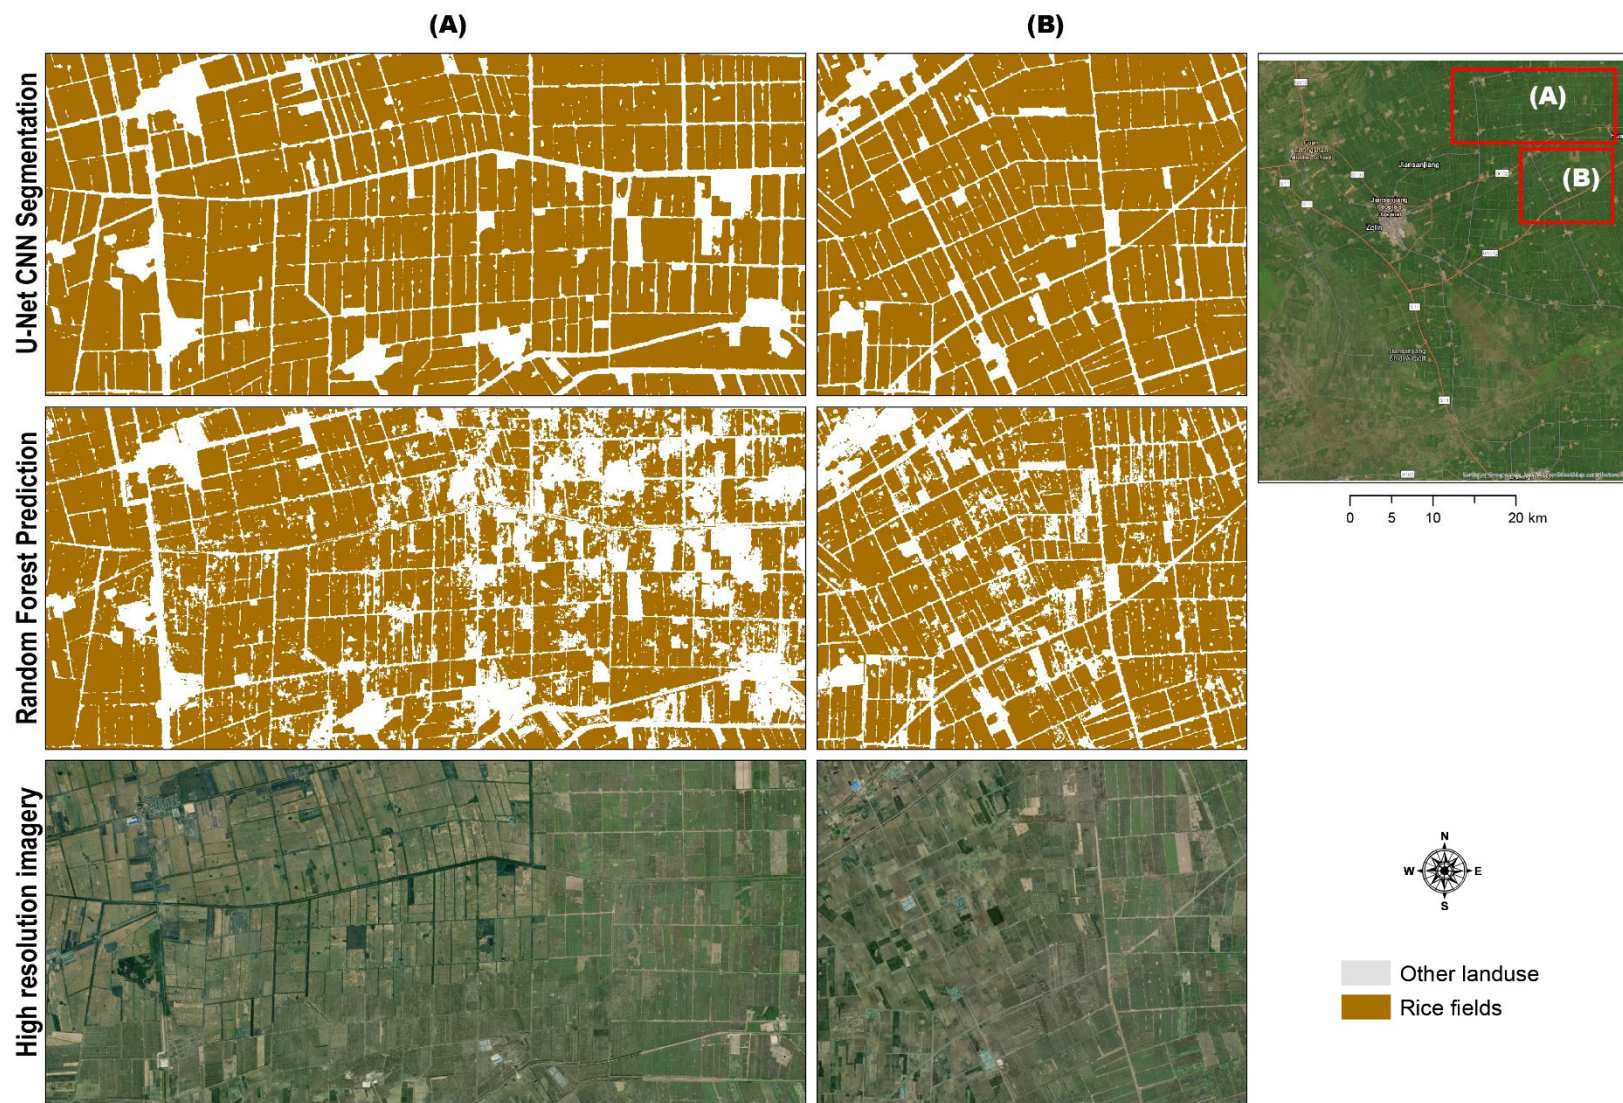

**Figure S8:** Comparison of U-Net segmentation and Random Forest predictions using Dataset 4.



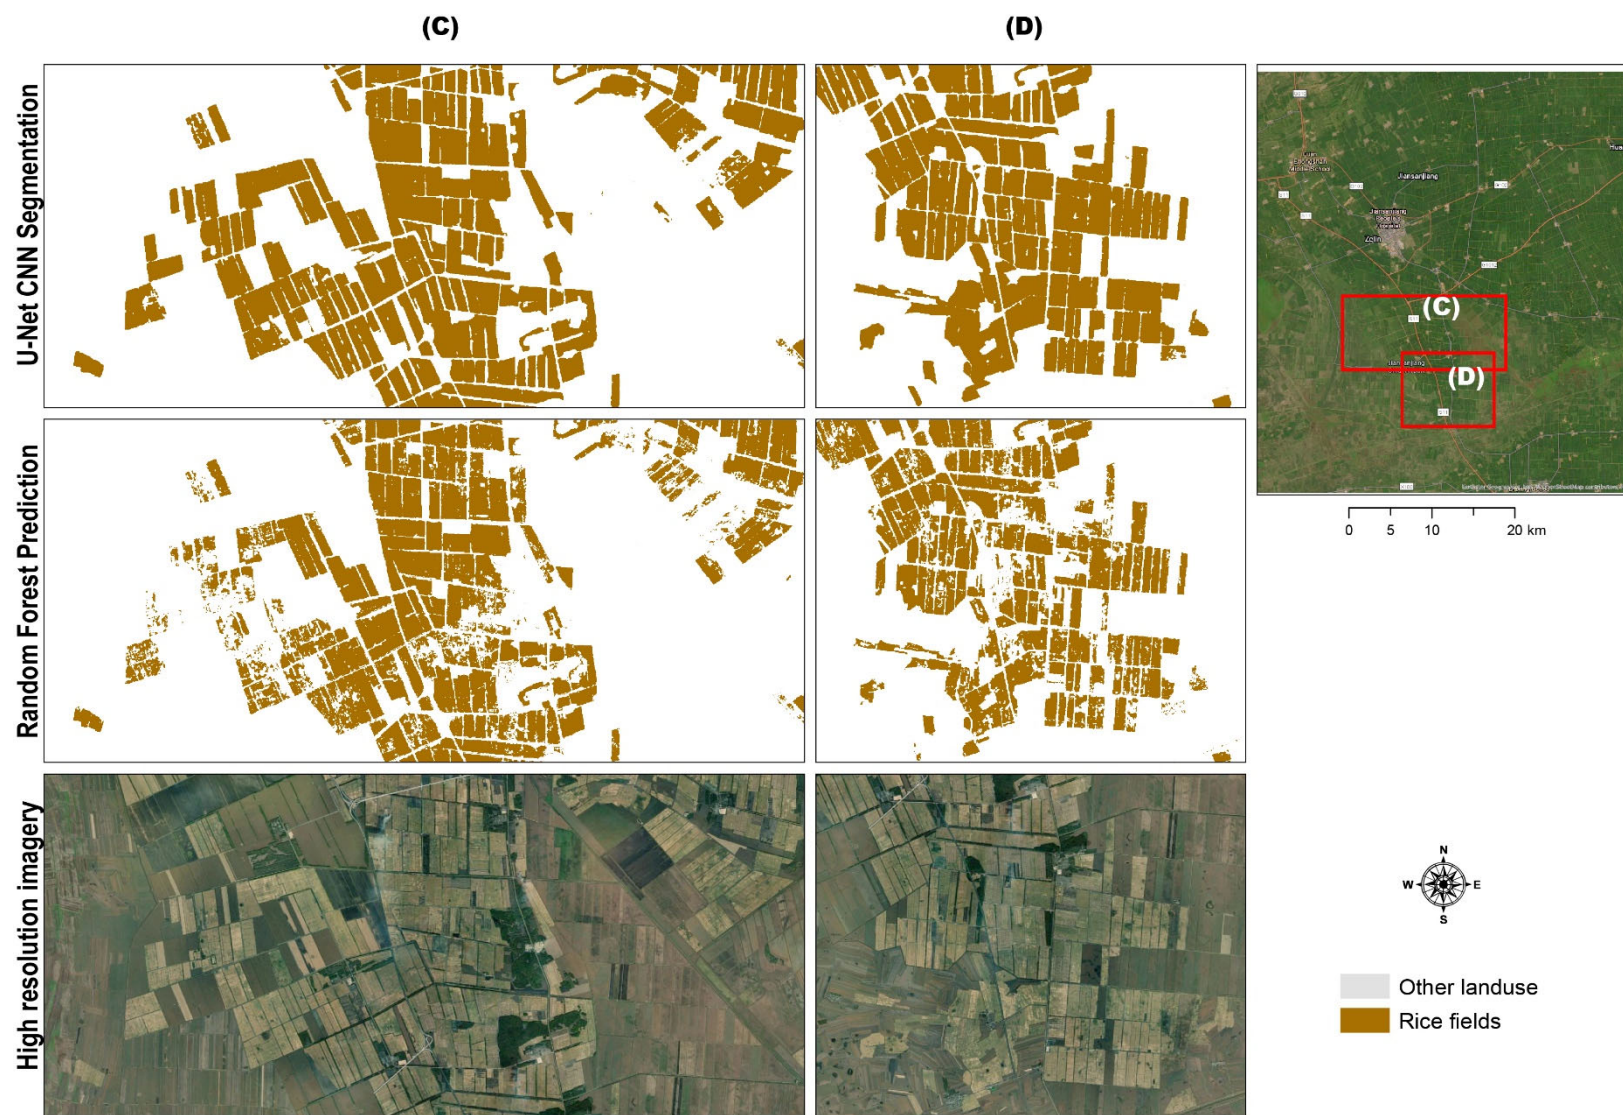

**Figure S9:** Comparison of U-Net segmentation and Random Forest predictions using Dataset 4 (contd.).

**Table S3:** Accuracy assessment results associated with the upscaled paddy rice mapping on the district scale for 2016, 2018, and 2020.

**U-Net - Dataset 4 - Multispectral + SAR bands (2016)**

| Class Name                 | Other land use | Rice fields | Total       | User's Accuracy |
|----------------------------|----------------|-------------|-------------|-----------------|
| Other landuse              | 701            | 8           | <b>709</b>  | 0.99            |
| Rice fields                | 49             | 242         | <b>291</b>  | 0.83            |
| <b>Total</b>               | <b>750</b>     | <b>250</b>  | <b>1000</b> |                 |
| <b>Producer's Accuracy</b> | 0.93           | 0.97        |             |                 |
| <b>F1-Score</b>            | 0.96           | 0.89        |             |                 |
| <b>Overall Kappa</b>       | 0.86           |             |             |                 |
| <b>Overall Accuracy</b>    | 0.94           |             |             |                 |
| <b>Mean F1-Score</b>       | 0.93           |             |             |                 |

**U-Net - Dataset 4 - Multispectral + SAR bands (2018)**

| Class Name                 | Other land use | Rice fields | Total       | User's Accuracy |
|----------------------------|----------------|-------------|-------------|-----------------|
| Other landuse              | 695            | 43          | <b>738</b>  | 0.94            |
| Rice fields                | 55             | 207         | <b>262</b>  | 0.79            |
| <b>Total</b>               | <b>750</b>     | <b>250</b>  | <b>1000</b> |                 |
| <b>Producer's Accuracy</b> | 0.93           | 0.83        |             |                 |
| <b>F1-Score</b>            | 0.93           | 0.81        |             |                 |
| <b>Overall Kappa</b>       | 0.74           |             |             |                 |
| <b>Overall Accuracy</b>    | 0.90           |             |             |                 |
| <b>Mean F1-Score</b>       | 0.87           |             |             |                 |

**U-Net - Dataset 4 - Multispectral + SAR bands (2020)**

| Class Name                 | Other land use | Rice fields | Total       | User's Accuracy |
|----------------------------|----------------|-------------|-------------|-----------------|
| Other landuse              | 683            | 37          | <b>720</b>  | 0.95            |
| Rice fields                | 67             | 213         | <b>280</b>  | 0.76            |
| <b>Total</b>               | <b>750</b>     | <b>250</b>  | <b>1000</b> |                 |
| <b>Producer's Accuracy</b> | 0.91           | 0.85        |             |                 |
| <b>F1-Score</b>            | 0.93           | 0.80        |             |                 |
| <b>Overall Kappa</b>       | 0.73           |             |             |                 |
| <b>Overall Accuracy</b>    | 0.90           |             |             |                 |
| <b>Mean F1-Score</b>       | 0.87           |             |             |                 |

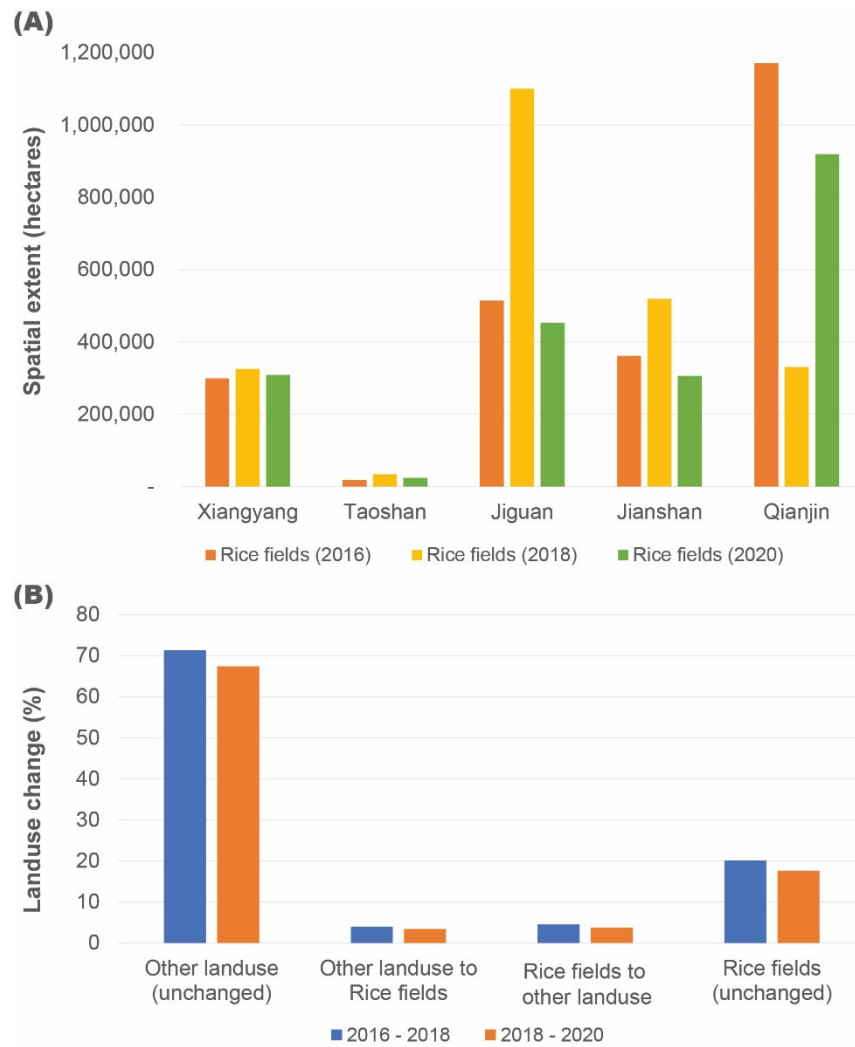

**Figure S10:** Graph showing (A) the spatial distribution of mapped paddy rice fields and (B) the percentages of land use change relative to the total project area for 2016, 2018, and 2020 respectively.



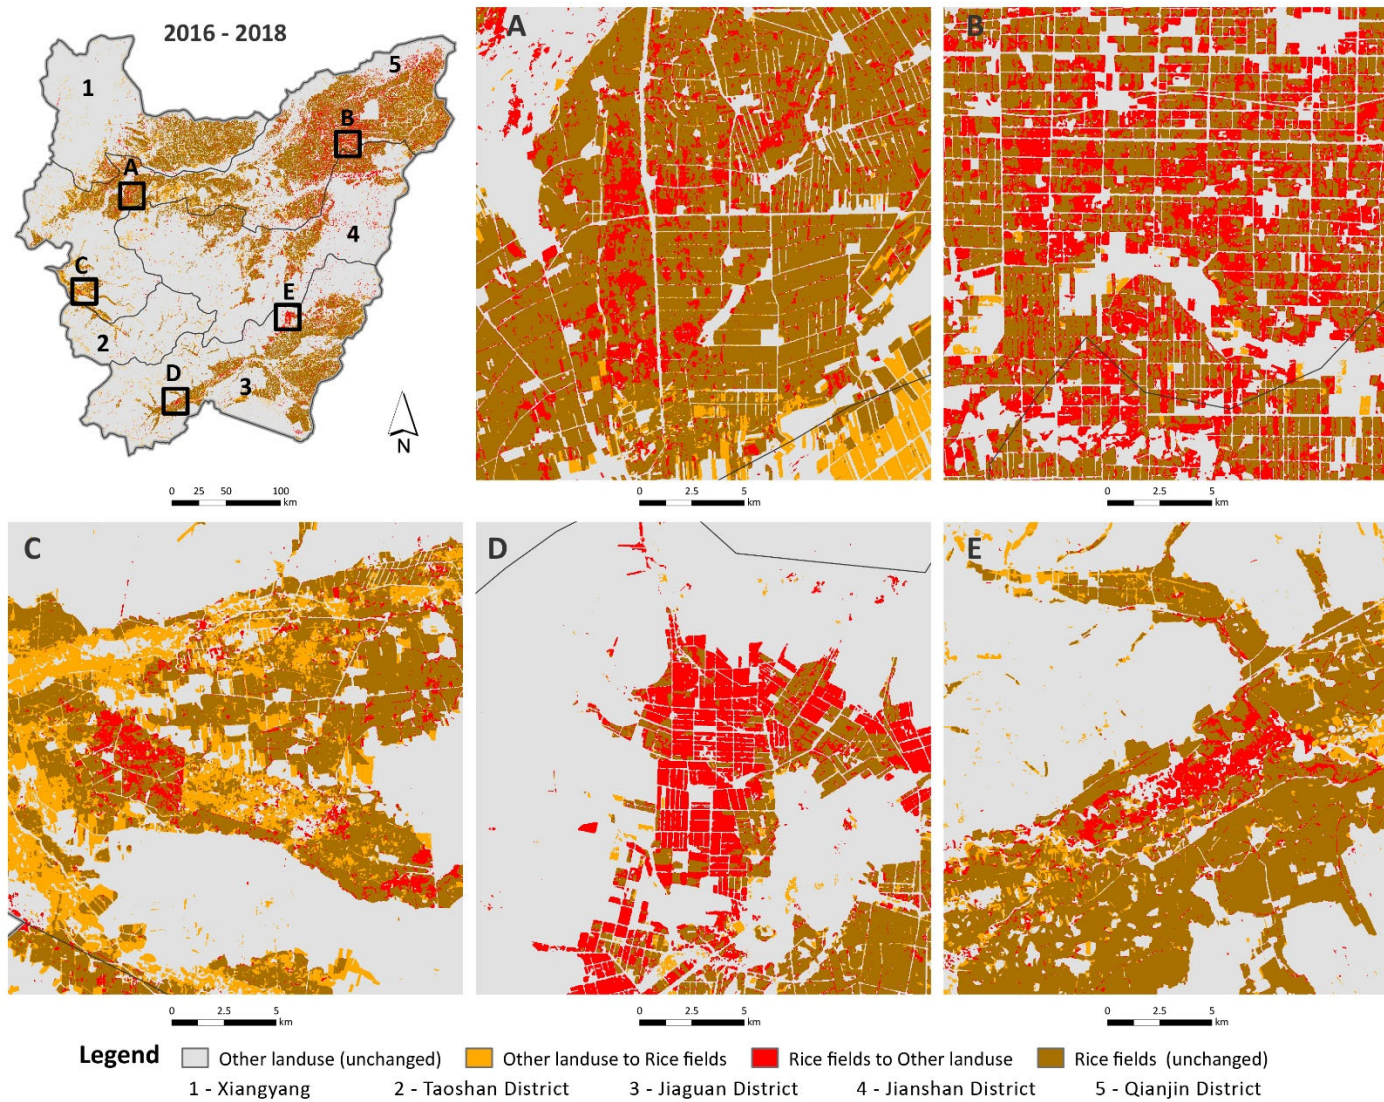

**Figure S11:** Change detection analysis results of selected sites between 2016 and 2018.



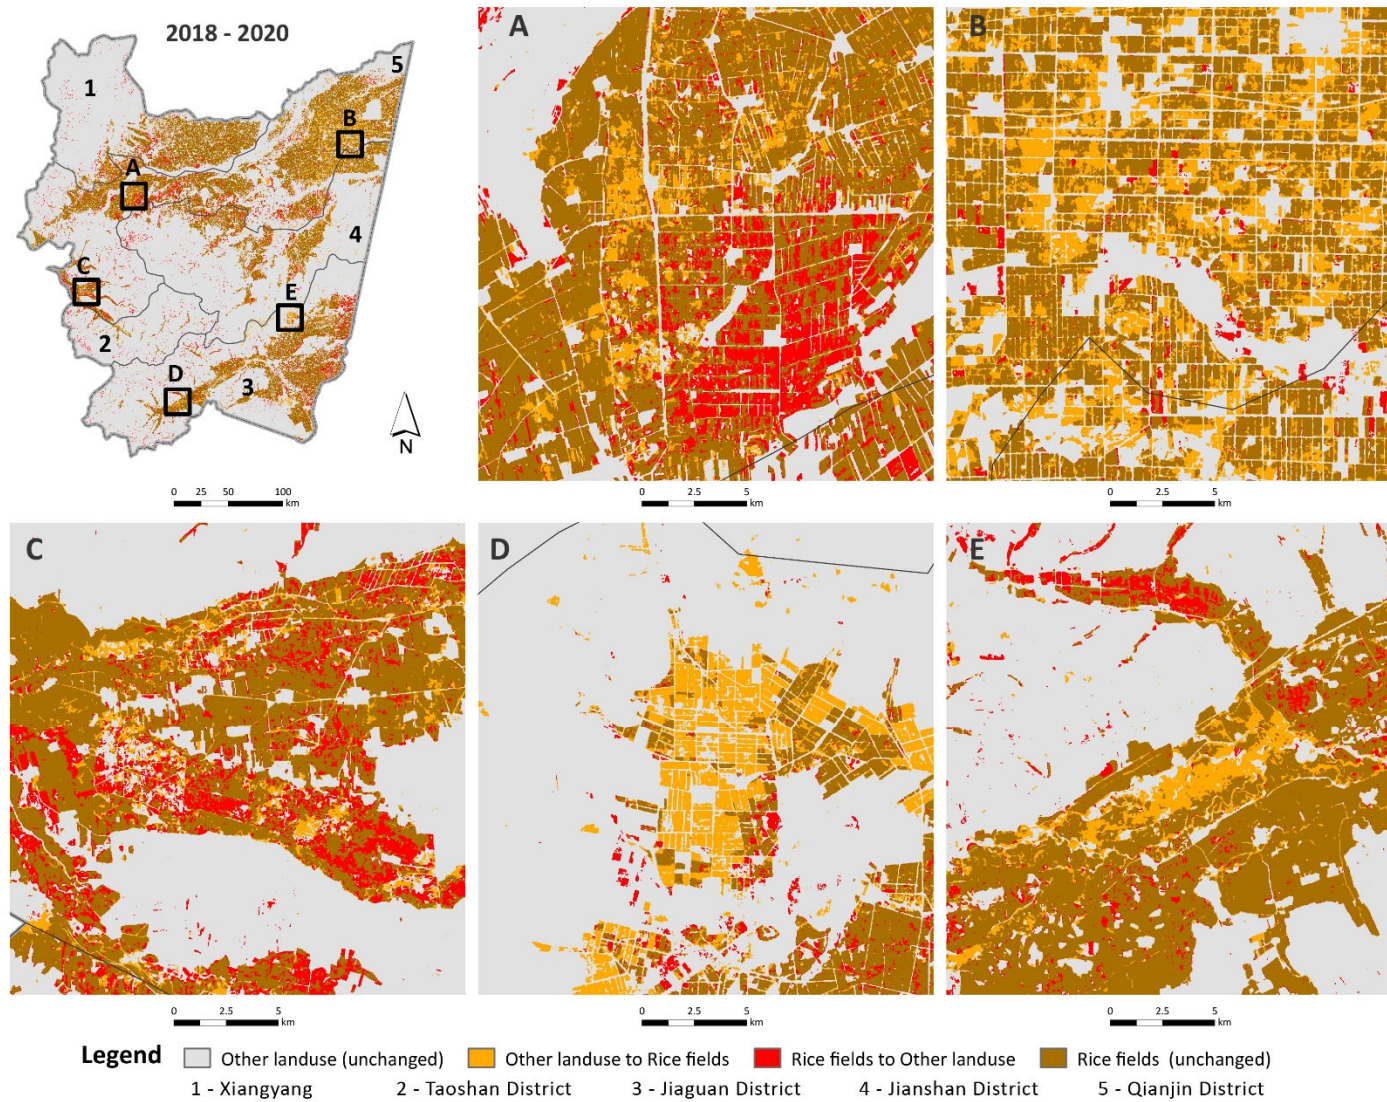

**Figure S12:** Change detection analysis results of selected sites between 2018 and 2020.

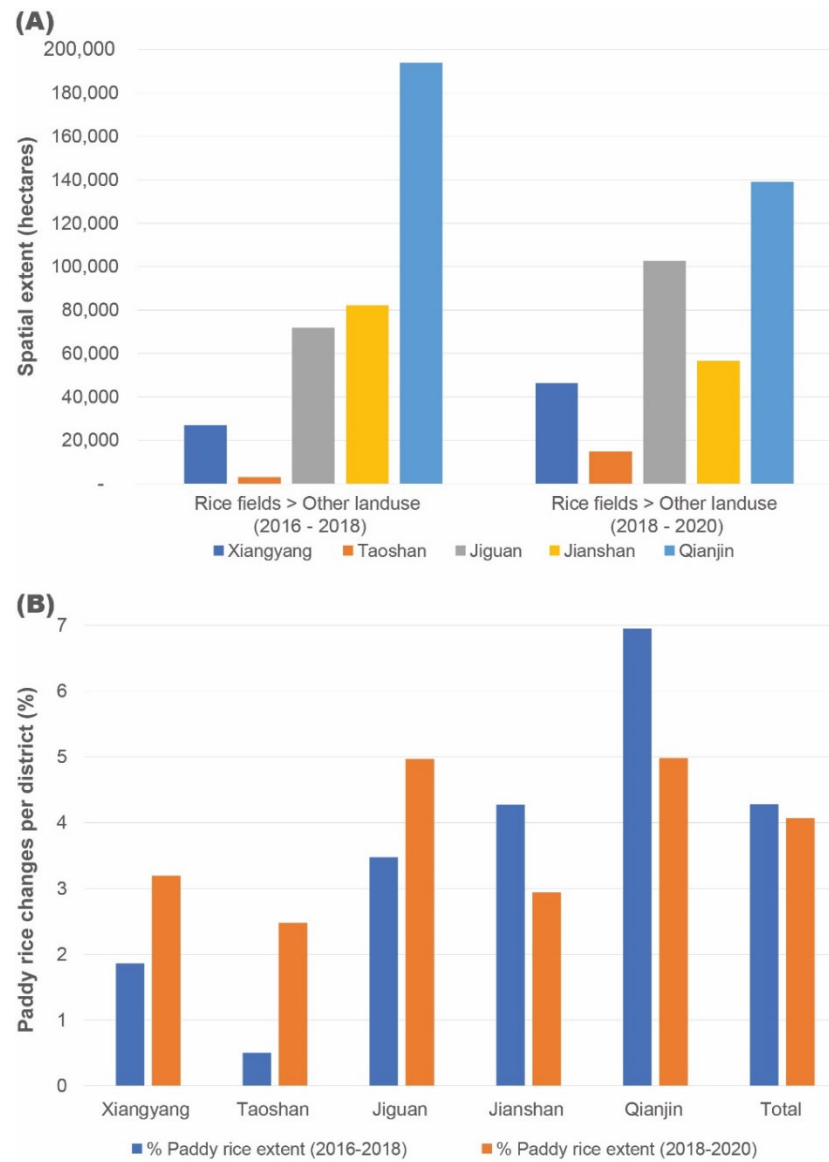

**Figure S13:** Graph showing (A): changes in paddy rice distribution and (B): the percentage of paddy rice loss for each district in the study area over two epochs (i.e., 2016 – 2018 and 2018 – 2020).

**Table S4:** Error matrix and classification accuracy results of U-Net predictions.**U-Net - Dataset 1 - Multispectral bands**

| Class Name                 | Built-up area | Vegetated  | Non-rice fields | Rice fields | Total       | Users' Accuracy |
|----------------------------|---------------|------------|-----------------|-------------|-------------|-----------------|
| Built-up area              | 155           | 23         | 6               | 7           | 191         | 0.81            |
| Vegetated                  | 19            | 170        | 2               | 0           | 191         | 0.89            |
| Non-rice fields            | 41            | 45         | 227             | 2           | 315         | 0.72            |
| Rice fields                | 35            | 12         | 15              | 241         | 303         | 0.80            |
| <b>Total</b>               | <b>250</b>    | <b>250</b> | <b>250</b>      | <b>250</b>  | <b>1000</b> |                 |
| <b>Producer's Accuracy</b> | 0.62          | 0.68       | 0.91            | 0.96        |             |                 |
| <b>F1-Score</b>            | 0.70          | 0.77       | 0.80            | 0.87        |             |                 |
| <b>Overall Kappa</b>       | 0.72          |            |                 |             |             |                 |
| <b>Overall Accuracy</b>    | 0.79          |            |                 |             |             |                 |
| <b>Mean F1-Score</b>       | 0.79          |            |                 |             |             |                 |

**U-Net - Dataset 2 - SAR bands**

| Class Name                 | Built-up area | Vegetated  | Non-rice fields | Rice fields | Total       | Users' Accuracy |
|----------------------------|---------------|------------|-----------------|-------------|-------------|-----------------|
| Built-up area              | 113           | 31         | 5               | 9           | 158         | 0.72            |
| Vegetated                  | 8             | 24         | 2               | 1           | 35          | 0.69            |
| Non-rice fields            | 60            | 92         | 226             | 28          | 406         | 0.56            |
| Rice fields                | 69            | 103        | 17              | 212         | 401         | 0.53            |
| <b>Total</b>               | <b>250</b>    | <b>250</b> | <b>250</b>      | <b>250</b>  | <b>1000</b> |                 |
| <b>Producer's Accuracy</b> | 0.45          | 0.10       | 0.90            | 0.85        |             |                 |
| <b>F1-Score</b>            | 0.55          | 0.17       | 0.69            | 0.65        |             |                 |
| <b>Overall Kappa</b>       | 0.43          |            |                 |             |             |                 |
| <b>Overall Accuracy</b>    | 0.58          |            |                 |             |             |                 |
| <b>Mean F1-Score</b>       | 0.52          |            |                 |             |             |                 |

**U-Net - Dataset 3 - Optical indices**

| Class Name                 | Built-up area | Vegetated  | Non-rice fields | Rice fields | Total       | Users' Accuracy |
|----------------------------|---------------|------------|-----------------|-------------|-------------|-----------------|
| Built-up area              | 153           | 37         | 6               | 8           | 204         | 0.75            |
| Vegetated                  | 23            | 130        | 3               | 1           | 157         | 0.83            |
| Non-rice fields            | 37            | 64         | 224             | 2           | 327         | 0.69            |
| Rice fields                | 37            | 19         | 17              | 239         | 312         | 0.77            |
| <b>Producer's Accuracy</b> | <b>250</b>    | <b>250</b> | <b>250</b>      | <b>250</b>  | <b>1000</b> |                 |
| <b>F1-Score</b>            | 0.61          | 0.52       | 0.90            | 0.96        | 0           |                 |
| <b>Overall Kappa</b>       | 0.67          | 0.64       | 0.78            | 0.85        |             |                 |
| <b>Overall Accuracy</b>    | 0.66          |            |                 |             |             |                 |
| <b>Mean F1-Score</b>       | 0.75          |            |                 |             |             |                 |
| <b>Producer's Accuracy</b> | 0.73          |            |                 |             |             |                 |



**Table S4:** Error matrix and classification accuracy results of U-Net predictions (contd.).**U-Net - Dataset 4 - Multispectral + SAR bands**

| <b>Class Name</b>          | <b>Built-up area</b> | <b>Vegetated</b> | <b>Non-rice fields</b> | <b>Rice fields</b> | <b>Total</b> | <b>Users' Accuracy</b> |
|----------------------------|----------------------|------------------|------------------------|--------------------|--------------|------------------------|
| Built-up area              | 159                  | 27               | 8                      | 6                  | 200          | 0.80                   |
| Vegetated                  | 14                   | 168              | 4                      | 1                  | 187          | 0.90                   |
| Non-rice fields            | 38                   | 46               | 228                    | 2                  | 314          | 0.73                   |
| Rice fields                | 39                   | 9                | 10                     | 241                | 299          | 0.81                   |
| <b>Total</b>               | <b>250</b>           | <b>250</b>       | <b>250</b>             | <b>250</b>         | <b>1000</b>  |                        |
| <b>Producer's Accuracy</b> | 0.64                 | 0.67             | 0.91                   | 0.96               |              |                        |
| <b>F1-Score</b>            | 0.71                 | 0.77             | 0.81                   | 0.88               |              |                        |
| <b>Overall Kappa</b>       | 0.73                 |                  |                        |                    |              |                        |
| <b>Overall Accuracy</b>    | 0.80                 |                  |                        |                    |              |                        |
| <b>Mean F1-Score</b>       | 0.79                 |                  |                        |                    |              |                        |

**U-Net - Dataset 5 - SAR + Multispectral bands**

| <b>Class Name</b>          | <b>Built-up area</b> | <b>Vegetated</b> | <b>Non-rice fields</b> | <b>Rice fields</b> | <b>Total</b> | <b>Users' Accuracy</b> |
|----------------------------|----------------------|------------------|------------------------|--------------------|--------------|------------------------|
| Built-up area              | 142                  | 24               | 4                      | 10                 | 180          | 0.79                   |
| Vegetated                  | 17                   | 130              | 5                      | 1                  | 153          | 0.85                   |
| Non-rice fields            | 52                   | 66               | 229                    | 2                  | 349          | 0.66                   |
| Rice fields                | 39                   | 30               | 12                     | 237                | 318          | 0.75                   |
| <b>Total</b>               | <b>250</b>           | <b>250</b>       | <b>250</b>             | <b>250</b>         | <b>1000</b>  |                        |
| <b>Producer's Accuracy</b> | 0.57                 | 0.52             | 0.92                   | 0.95               |              |                        |
| <b>F1-Score</b>            | 0.66                 | 0.65             | 0.76                   | 0.83               |              |                        |
| <b>Overall Kappa</b>       | 0.65                 |                  |                        |                    |              |                        |
| <b>Overall Accuracy</b>    | 0.74                 |                  |                        |                    |              |                        |
| <b>Mean F1-Score</b>       | 0.73                 |                  |                        |                    |              |                        |

**U-Net - Dataset 6 - Multispectral bands + optical indices**

| <b>Class Name</b>          | <b>Built-up area</b> | <b>Vegetated</b> | <b>Non-rice fields</b> | <b>Rice fields</b> | <b>Total</b> | <b>Users' Accuracy</b> |
|----------------------------|----------------------|------------------|------------------------|--------------------|--------------|------------------------|
| Built-up area              | 157                  | 27               | 7                      | 4                  | 195          | 0.81                   |
| Vegetated                  | 17                   | 174              | 2                      | 0                  | 193          | 0.90                   |
| Non-rice fields            | 43                   | 42               | 227                    | 4                  | 316          | 0.72                   |
| Rice fields                | 33                   | 7                | 14                     | 242                | 296          | 0.82                   |
| <b>Total</b>               | <b>250</b>           | <b>250</b>       | <b>250</b>             | <b>250</b>         | <b>1000</b>  |                        |
| <b>Producer's Accuracy</b> | 0.63                 | 0.70             | 0.91                   | 0.97               |              |                        |
| <b>F1-Score</b>            | 0.71                 | 0.79             | 0.80                   | 0.89               |              |                        |
| <b>Overall Kappa</b>       | 0.73                 |                  |                        |                    |              |                        |
| <b>Overall Accuracy</b>    | 0.80                 |                  |                        |                    |              |                        |
| <b>Mean F1-Score</b>       | 0.79                 |                  |                        |                    |              |                        |

**Table S4:** Error matrix and classification accuracy results of U-Net predictions (contd.).

| <b>U-Net - Dataset 7 - Multispectral + SAR + optical indices</b> |                      |                  |                        |                    |              |                        |
|------------------------------------------------------------------|----------------------|------------------|------------------------|--------------------|--------------|------------------------|
| <b>Class Name</b>                                                | <b>Built-up area</b> | <b>Vegetated</b> | <b>Non-rice fields</b> | <b>Rice fields</b> | <b>Total</b> | <b>Users' Accuracy</b> |
| Built-up area                                                    | 159                  | 36               | 8                      | 7                  | 210          | 0.76                   |
| Vegetated                                                        | 17                   | 158              | 3                      | 0                  | 178          | 0.89                   |
| Non-rice fields                                                  | 41                   | 45               | 226                    | 2                  | 314          | 0.72                   |
| Rice fields                                                      | 33                   | 11               | 13                     | 241                | 298          | 0.81                   |
| <b>Total</b>                                                     | <b>250</b>           | <b>250</b>       | <b>250</b>             | <b>250</b>         | <b>1000</b>  |                        |
| <b>Producer's Accuracy</b>                                       | 0.64                 | 0.63             | 0.90                   | 0.96               |              |                        |
| <b>F1-Score</b>                                                  | 0.69                 | 0.74             | 0.80                   | 0.88               |              |                        |
| <b>Overall Kappa</b>                                             | 0.71                 |                  |                        |                    |              |                        |
| <b>Overall Accuracy</b>                                          | 0.78                 |                  |                        |                    |              |                        |
| <b>Mean F1-Score</b>                                             | 0.78                 |                  |                        |                    |              |                        |

## Appendix S1: Google Earth Engine Codes

### *Sentinel-1 SAR data:*

2016: <https://code.earthengine.google.com/ccdce29bd42f21d23505bfd73652752d>

2018: <https://code.earthengine.google.com/c1d8f2a38a715d6b55ee7f1c9482d7d3>

2020: <https://code.earthengine.google.com/59b163e632aae630f733deba355b8ee9>

### *Sentinel-2 multispectral data*

2016: <https://code.earthengine.google.com/c75475d18d8c2ea8ef0334bd3114d626>

2018: <https://code.earthengine.google.com/48c6c94ecc37ab7c6d28f0e60b790c7e>

2020: <https://code.earthengine.google.com/c3e5d095b6ceb6040693879d254a9cbe>

### *Paddy Rice mapping app -*

<https://jolexy.maps.arcgis.com/apps/webappviewer/index.html?id=d4d061430bea480eb20ace85919861e5>
